# Supplementary material for: Evaluating cancer screening utilization in the U.S. by socioeconomic stress: insights from National Health Interview Survey (NHIS) 2021 data
Source: Research Square preprint supplement (doi:10.21203/rs.3.rs-7124210/v1), 2025-07-25
Supplement: Supplementary file 1 [file d8bd933ef039db88ccd8ce8a.docx]

Table A1: Cancer screening questions from NHIS 2021 Data

| Cancer Type | Screening Questions |
| --- | --- |
| Breast Cancer Screening | Have you ever had a mammogram? |
| About how long has it been since your most recent mammogram? |
| Cervical Cancer Screening | Have you ever had a test or tests to check for cervical cancer? |
| When did you have your most recent test to check for cervical cancer? |
| At your most recent cervical cancer screening, did you have a Pap test? |
| At your most recent cervical cancer screening, did you have an HPV test? |
| Have you had a hysterectomy? |
| Colorectal Cancer Screening | Have you ever had a colonoscopy or sigmoidoscopy to check for colon cancer? |
| About how long has it been since your most recent colonoscopy? |
| When was your most recent colonoscopy or sigmoidoscopy? |
| When was your most recent sigmoidoscopy? |
| Have you ever had a CT colonography or virtual colonoscopy? |
| When was your most recent CT colonography or virtual colonoscopy? |
| Have you ever had a blood stool or FIT test, using a home test kit? |
| When was your most recent blood stool or FIT test, using a home test kit? |
| Have you ever had a Cologuard test? |
| Was the blood stool or FIT test you reported earlier conducted as part of a Cologuard test? |
| When did you have your most recent Cologuard test? |

Table A2: Sample counts by race/ethnicity for cervical cancer, breast, colorectal cancer female and male classified by socioeconomic stress levels.

| Cancer Type | Socioeconomic Stress level | NH White | NH Black | Hispanic |
| --- | --- | --- | --- | --- |
| Unweighted Count | Unweighted Count | Unweighted Count |
| Cervical Cancer | Low Socioeconomic Stress | 1,819 | 150 | 175 |
| Medium Socioeconomic Stress | 2,612 | 505 | 685 |
| High Socioeconomic Stress | 721 | 397 | 640 |
| Breast Cancer | Low Socioeconomic Stress | 1,276 | 108 | 67 |
| Medium Socioeconomic Stress | 2,627 | 409 | 330 |
| High Socioeconomic Stress | 565 | 225 | 230 |
| Colorectal Cancer: Female | Low Socioeconomic Stress | 1,624 | 133 | 100 |
| Medium Socioeconomic Stress | 3,180 | 499 | 418 |
| High Socioeconomic Stress | 680 | 281 | 314 |
| Colorectal Cancer: Male | Low Socioeconomic Stress | 1,482 | 87 | 92 |
| Medium Socioeconomic Stress | 2,675 | 368 | 359 |
| High Socioeconomic Stress | 577 | 196 | 273 |
